RESEARCH ARTICLE

# Effect of Butyrate on Collagen Expression, Cell Viability, Cell Cycle Progression and Related Proteins Expression of MG-63 Osteoblastic Cells

Mei-Chi Chang<sup>1,2‡</sup>, Yi-Ling Tsai<sup>3‡</sup>, Eric Jein-Wein Liou<sup>2</sup>, Chia-Mei Tang<sup>3</sup>, Tong-Mei Wang<sup>3</sup>, Hsin-Cheng Liu<sup>4</sup>, Ming-Wei Liao<sup>3</sup>, Sin-Yuet Yeung<sup>2</sup>, Chiu-Po Chan<sup>2\*</sup>, Jiiang-Huei Jeng<sup>3\*</sup>

**1** Biomedical Science Team, Chang Gung University of Science and Technology, Kwei-Shan, Taoyuan City, Taiwan, **2** Department of Dentistry, Chang Gung Memorial Hospital, Taipei, Taiwan, **3** Graduate Institute of Clinical Dentistry and Department of Dentistry, National Taiwan University Hospital and National Taiwan University Medical College, Taipei, Taiwan, **4** Wei-Cheng International Dental Group, Taipei, Taiwan

‡ These authors are equally contributing first authors.

\* [carol@adm.cgmh.org.tw](mailto:carol@adm.cgmh.org.tw) (CPC); [jhjeng@ntu.edu.tw](mailto:jhjeng@ntu.edu.tw) (JHJ)

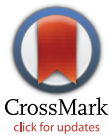

**OPEN ACCESS**

**Citation:** Chang M-C, Tsai Y-L, Liou EJ-W, Tang C-M, Wang T-M, Liu H-C, et al. (2016) Effect of Butyrate on Collagen Expression, Cell Viability, Cell Cycle Progression and Related Proteins Expression of MG-63 Osteoblastic Cells. PLoS ONE 11(11): e0165438. doi:10.1371/journal.pone.0165438

**Editor:** Yuan-Soon Ho, Taipei Medical University, TAIWAN

**Received:** August 31, 2016

**Accepted:** October 11, 2016

**Published:** November 28, 2016

**Copyright:** © 2016 Chang et al. This is an open access article distributed under the terms of the [Creative Commons Attribution License](https://creativecommons.org/licenses/by/4.0/), which permits unrestricted use, distribution, and reproduction in any medium, provided the original author and source are credited.

**Data Availability Statement:** All relevant data are within the paper and supporting information files.

**Funding:** This study was supported by grants from Chang Gung Memorial Hospital (CMRPF1F0071, CMRPF3E0021, CMRPF3E0022, CMRPF1F0071, NMRPF3E0041, NMRPF3E0042, NMRPF3C0091, NMRPF3C0092, NMRPF3C0093, NMRPF3C0061, NMRPF3C0062) and Ministry of Science and Technology (MOST104-2314-B-255-010-MY3; NSC102-2628-B-255-001-MY3; NSC102-2314-B-255-003-MY2), Taipei, Taiwan. The funders had no role in study design, data collection and analysis,

## Abstract

### Aims

Butyric acid is one major metabolic product generated by anaerobic Gram-negative bacteria of periodontal and root canal infection. Butyric acid affects the activity of periodontal cells such as osteoblasts. The purposes of this study were to investigate the effects of butyrate on MG-63 osteoblasts.

### Methods

MG-63 cells were exposed to butyrate and cell viability was estimated by 3-(4,5-dimethylthiazol-2-yl)-2,5-diphenyltetrazolium bromide (MTT) assay. The mRNA and protein expression of type I collagen and cell cycle-related proteins were measured by reverse-transcriptase polymerase chain reaction (RT-PCR), western blotting or immunofluorescent staining. Cellular production of reactive oxygen species (ROS) was analyzed by 2',7'-dichlorofluorescein (DCF) fluorescence flow cytometry.

### Results

Exposure to butyrate suppressed cell proliferation, and induced G2/M (8 and 16 mM) cell cycle arrest of MG-63 cells. Some cell apoptosis was noted. The mRNA expression of *cdc2* and *cyclin-B1* decreased after exposure to butyrate. The protein expression of type I collagen, *cdc2* and *cyclin B1* were decreased, whereas the expression of *p21*, *p27* and *p57* was stimulated. Under the treatment of butyrate, ROS production in MG-63 cells markedly increased.

### Conclusions

The secretion of butyric acid by periodontal and root canal microorganisms may inhibit bone cell growth and matrix turnover. This is possibly due to induction of cell cycle arrest and

decision to publish, or preparation of the manuscript.

**Competing Interests:** The authors have declared that no competing interests exist.

ROS generation and inhibition of collagen expression. These results suggest the involvement of butyric acid in the pathogenesis of periodontal and periapical tissue destruction by impairing bone healing responses.

## Introduction

Microorganisms are shown to play important roles in the diseased processes of periodontal and pulpal/periapical lesions. Various periodontal and root canal pathogens such as *Porphyromonas*, *Eubacterium*, *Fusobacteria* and *Peptococci* etc. may be involved in the initiation and propagation of these diseased processes by generation a number of toxic products such as lipopolysaccharide, short chain fatty acids (SCFA), proteases etc. [1–5]. During the metabolism of amino acids, hexose or pentose by microorganisms, significant amounts of butyric acid are produced in the periodontal pockets and root canals [2–5], and affect the biological activities of adjacent periodontal cells (e.g., gingival fibroblasts, bone cells, periodontal ligament cells). The concentration of SCFAs (e.g., acetic acid, propionic acid and butyric acid) in gingival crevicular fluid (GCF) from diseased periodontal pocket is generally at mM concentration, and associated with the severity of periodontal diseases. SCFA levels of GCF declined after non-surgical periodontal treatment [4,6]. The mean concentrations of butyric acid in GCF collected from sites of severe periodontitis, mild periodontitis and healthy teeth are about 2.6 mM, 0.2 mM and undetectable, respectively [4]. The other paper also shows the level of butyric acid to be 0.5–16 mM in GCF from sites with different diseased status [7].

Butyrate at higher concentrations may inhibit leukocyte apoptosis and function, but stimulates leukocyte cytokine production. It also impedes the growth of vascular endothelial cells, gingival epithelial cells and fibroblasts [3,8,9]. Higher concentration of butyrate (1 mM) suppresses the Runt-related transcription factor 2 (Runx2), osterix, distal-less homeobox 5 (Dlx5), Msh homeobox 2 (Msx2), alkaline phosphatase (ALP), osteocalcin, and bone sialoprotein expression, but stimulates AJ18 expression of ROS17/2.8 osteoblasts [10], suggesting inhibition of differentiation. Butyric acid further suppressed the proliferation and Con A-stimulated interleukin 2 (IL-2), IL-4, IL-5, IL-6, and IL-10 production in splenic-T cells [11]. All these effects are involved in the diseased processes of periodontal and periapical tissue injuries.

ROS are critical molecules for induction of signal transduction and toxic events by chemicals and carcinogenic agents [12,13]. Recent study suggests that increased ROS levels are associated with bony destruction in periodontitis [14]. Butyrate has been shown to suppress the proliferation of periodontal tissue cells and thus contribute to the periodontal tissue inflammation and breakdown. The cell growth is tightly controlled by cell cycle and cell cycle-related genes such as cdc2, p21 and cyclins [15,16]. We hypothesized that butyrate may impair bone tissue healing via inhibition of collagen formation, cell growth and cell cycle progression of osteoblasts, inducing ROS production and involved in the pathogenesis of periodontal and periapical diseases. We therefore investigated the effect of butyrate on the growth, cell cycle progression, collagen expression and ROS production of MG-63 osteoblastic cells.

## Materials and Methods

### Materials

MG-63 osteoblastic cells were from American Type Culture Collection (ATCC, USA). All cell culture biologicals were obtained from Gibco (Life technologies, Grand Island, NY, USA). Propidium iodide (PI), sodium butyrate, 3-(4,5-dimethylthiazol-2-yl)-2,5-diphenyltetrazolium

bromide (MTT) and 2',7'- Dichlorodihydrofluorescein diacetate (DCFH-DA) were bought from Sigma (Sigma Chemical Company, St. Louis, MO, USA). The SuperScript™ III First-Strand DNA synthesis system for reverse transcriptase polymerase chain reaction (RT-PCR) was from Invitrogen (Invitrogen Corporation, Carlsbad, CA, USA). RNase A for flow cytometric analysis was from Becton-Dickinson (San Jose, CA, USA). Antibodies against Glyceraldehyde 3-phosphate dehydrogenase (GAPDH), cdc2, cyclin B1, p21, and type I collagen were obtained from Santa Cruz (Santa Cruz, USA). Antibodies for p27 and p57 were from GeneTex (GeneTex International Corporation, Hsin-Chu City, Taiwan).

### Culture of MG-63 cells

MG-63 cells were cultured in Dulbecco's modified Eagle's medium (DMEM) containing 10% fetal bovine serum (FBS), 1x penicillin and 100 µg/ml of streptomycin.

### Cell Viability Assay

Viability of cells was estimated by the MTT colorimetric assay. MG-63 cells ( $5 \times 10^4$  cells/well) were cultured in 6-well culture plates for 24 h at 37°C. Cells were subsequently cultured in fresh medium containing different concentrations of butyrate (1–16 mM) for 5 days. Medium was aspirated and the insoluble formazan generated by viable cells were dissolved in dimethylsulfoxide (DMSO) and read against solvent blank (DMSO) at a wavelength of 540 nm (OD540) by an enzyme-linked immunosorbant assay (ELISA) reader (Multiskan Spectrum, USA) [17].

### Effect of butyrate on the cell cycle progression of MG-63 cells

In brief,  $5 \times 10^5$  of MG-63 cells were inoculated onto 6-well culture plates. After 24 h of cell adhesion, they were incubated to various concentrations of butyrate (1–16 mM) for 24 h. After incubation for 24 h, floating cells in the culture medium were collected. The attached MG-63 cells were detached from the culture wells by treatment with trypsin/ethylenediamine tetraacetic acid (EDTA). Thereafter we collected both the floating and attached cells. Cell cycle analysis was done as described previously [18,19]. Briefly, we washed the collected cells with phosphate buffered saline (PBS) and then fixed the cells in 70% ice-cold ethanol. After 24 h, the cells were washed with PBS, and then incubated in PBS containing RNase. Finally, the cells were stained for 15 min with propidium iodide (PI, 40 µg/ml). After washing and centrifugation, the fluorescence of PI in MG-63 cells was counted by flow cytometric analysis (FACSCalibur, Becton Dickinson, Worldwide Inc., San-Jose, California). The wavelength of laser excitation was set at 488 nm with an emission wavelength collected at higher than 590 nm. The PI fluorescence of 20000 cells was analyzed for both control and experimental samples. We determined the percentage of cells residing in sub-G0/G1, G0/G1-, S- and G2/M phases by using Modifit software and CellQuest programs.

### Effects of butyrate on cell cycle-related genes expression

**RNA isolation.** In brief,  $1-1.5 \times 10^6$  of MG-63 cells were seeded into 10-cm culture dishes. Cells were allowed for attachment for 24 hours and then exposed to various concentrations of butyrate (0–16 mM) for 24 h. Total RNA was isolated with RNA isolation kit [20].

Reverse transcriptase-polymerase chain reaction (RT-PCR) was performed using specific primers for beta-actin (BAC), cdc2, cyclinB1, and p21 as described before [9,21]. Briefly, 3 µg of denatured total RNA was reverse transcribed in a total volume of 10 µl reaction mixture comprising 4 µl of random primer (500 µg/ml), 1 µl of dNTP (2.5 mM), 2 µl of 10x RT buffer,

1  $\mu\text{l}$  of RNase inhibitor (40 U/ $\mu\text{l}$ ) and 1  $\mu\text{l}$  of RT (21 U/ $\mu\text{l}$ ) at 42°C for 50 min. Then, we used 2  $\mu\text{l}$  of cDNA for PCR amplification in a reaction volume of 50  $\mu\text{l}$  comprising 5  $\mu\text{l}$  of 10x Super TAQ buffer, 200  $\mu\text{mol}$  of dNTP (2.5 mM), 1  $\mu\text{l}$  of each specific primer, and 0.2  $\mu\text{l}$  of Super TAQ enzyme (2 U/ $\mu\text{l}$ ). The PCR reaction was performed at 94°C for 5 min for the first cycle, and then further amplified for 20–35 cycles at 94°C for 30 s, 55°C for 1 min and then 72°C for 30 s with a thermal cycler (Perkin Elmer 4800, PE Applied Biosystems, Foster city, CA, USA). Lastly, the reaction was completed at 72°C for additional 10 min. The specific primer pairs of this study were: cyclin B1, cdc2 and p21 as described before [9,21]. The PCR-amplified products were subjected to 1.8% agarose gel electrophoresis and then the gels were stained with ethidium bromide and pictures were taken. The PCR-amplified DNA product that presented linear in relation to the input RNA was used for picture and data presentation. The amplification of the  $\beta$ -actin (BAC) gene was used as control.

### Effects of Butyrate on Cell cycle-related, and Type I Collagen Protein Expression

Briefly,  $1\text{--}1.5 \times 10^6$  of MG-63 cells were inoculated onto 10-cm culture dishes. After 24 h of cell attachment, they were exposed to different concentrations of butyrate (0–16 mM) for 24 h. After washing with PBS, cells were disrupted in lysis buffer (10 mM Tris-HCl, pH 7; 140 mM sodium chloride; 3 mM magnesium chloride; 0.5% NP-40; 2 mM phenylmethylsulfonyl fluoride; 1% aprotinin; and 5 mM dithiothreitol) [17,18,20]. Then aliquots (20–50  $\mu\text{g}$  protein) of cell lysates were subjected to 12.5% sodium dodecyl sulfate-polyacrylamide gel electrophoresis (SDS-PAGE) and conveyed to a polyvinylidene fluoride (PVDF) membrane. The membrane was then blotted with anti-human cdc2, cyclin B1, p21, p27, p57, type I collagen and GAPDH antibodies for 2 h. The membranes were then incubated with anti-goat, anti-mouse, or anti-rabbit horseradish peroxidase-linked secondary antibodies, respectively (Jackson ImmunoResearch Laboratories, West Grove, PA, USA) for 1 h. After washing of the membrane by buffer, ECL reagents (Amersham) were added and the chemiluminescence was identified by exposure of the membranes to Fuji films for 30 s to 10 min. The strength of immunoreactive band of GAPDH was utilized as control.

### Immunofluorescent Microscope Observation of Cellular Type I Collagen Expression

Briefly,  $1 \times 10^5$  of MG-63 cells were seeded on the sterile coverslips in a 24-well plate in DMEM and 10% FBS. After 24 h, they were subjected to different concentrations of butyrate (0–16 mM) for additional 24 h. Medium was decanted, and cells were rinsed with PBS and fixed for 20 min in 4% paraformaldehyde. Cells were washed by PBS, membrane penetration with 2% Triton X-100, incubated for 20 min in 0.3% v/v  $\text{H}_2\text{O}_2$ . After washed with PBS, cells were blocked in 5% bovine serum albumin (BSA) for 1 h and then incubated in primary antibodies (against type I collagen) at room temperature overnight. After washing by PBS, cells were incubated in corresponding secondary antibody in the dark for 1 h and counterstained for 30 min with 4',6-diamidino-2-phenylindole (DAPI, 1:1000) [17]. Finally the samples were mounted and observed/photographed by an Olympus IX71 inverted microscope and DP Controller/Manager software (Olympus Corporation).

### Effect of butyrate on cellular ROS levels

Briefly,  $2.5 \times 10^5$  of MG-63 cells were plated into 6-well culture wells. After 24 h of cell adhesion, cells were incubated in fresh medium containing different concentrations of butyrate (0–

16 mM) for 24 h. ROS levels in MG-63 cell were measured by single cell DCF fluorescence flow cytometric analysis as described previously [19,22]. Briefly, MG-63 cells were treated with 10  $\mu$ M DCFH-DA for the final 30 min. Cells were then washed with PBS, collected and soon subjected to flow cytometry analysis of cellular DCF fluorescence (Becton Dickinson, USA).

## Statistical Analysis

Four or more separate experiments were performed with similar results. Results were analyzed by one-way ANOVA and post-hoc Turkey test. A  $p$  value  $< 0.05$  was considered to have statistically significant difference between 2 groups. PCR and western blotting images were analyzed by Image J software for quantification and results were expressed as fold of control. In some experiments, the 50% inhibitory concentration of butyrate was calculated by regression analysis.

## Results

### Effect of Butyrate on the Proliferation of MG-63 Cells

After exposure of MG-63 cells to different concentrations of butyrate (1–16 mM) for 5 days, evident growth inhibition of butyrate (4–16 mM) toward MG-63 cells was noted. Butyrate inhibited viable cells by 17% and 77%, respectively, at concentrations of 8 and 16 mM (Fig 1).

### Effect of Butyrate on Cell Cycle Progression of MG-63 Cells

Butyrate induced G2/M cell cycle arrest of MG-63 cells at concentrations of 4–16 mM (Fig 2A). When MG-63 cells ( $5 \times 10^5$  MG-63 cells/well) were exposed to butyrate (4–16 mM) for 24 h, a discernible increase in sub-G0/G1 population of MG-63 cells was observed (Fig 2B).

### Effect of Butyrate on Cell cycle-related Gene Expression

RT-PCR analysis revealed a decline of *cdc2*, *cyclinB1* mRNA expression and a rise in *p21* mRNA expression was noted after exposure of MG-63 cells to butyrate ( $> 2$  mM) (Fig 3A).

### Effect of Butyrate on Cell Cycle- Related Proteins Expression

Similarly a decline in *cdc2* and *cyclin B1* protein expression of MG-63 cells was noted after exposure to butyrate ( $> 1$  mM). An increase in *p21*, *p27* and *p57* protein expression was noted at butyrate concentrations higher than 2 mM (Fig 3B). Quantitatively, butyrate stimulated the expression of *p21* to 1.8–9.1-folds of control at concentrations ranging from 1–16 mM (Fig 3C). At similar concentrations, butyrate also induced *p27* protein expression to 2.22- to 2.73-fold of control (Fig 3D). Accordingly, butyrate stimulated *p57* proteins expression by 1.3 to 1.7-fold of control, at concentrations of 4–16 mM (Fig 3E). Butyrate inhibited *cyclin B1* protein expression with an  $IC_{50}$  of about 12.5 mM (Fig 3F). Butyrate suppressed the *cdc2* expression at concentrations of 8 and 16 mM, with 23% and 32% of inhibition (Fig 3G).

### Effect of Butyrate on Type I Collagen Expression

The protein level of type I collagen also decreased after exposure to butyrate ( $> 1$  mM) as analyzed by western blotting (Fig 4A). Quantitatively, butyrate inhibited the collagen protein expression of MG63 cells by 43% to 77% at concentrations ranging from 2 mM to 16 mM (Fig 4B, S1 Table), with a 50% inhibitory concentration ( $IC_{50}$ ) about 3.2 mM. Accordingly, immunofluorescent analysis of type I collagen expression in MG-63 cells also revealed the decreased

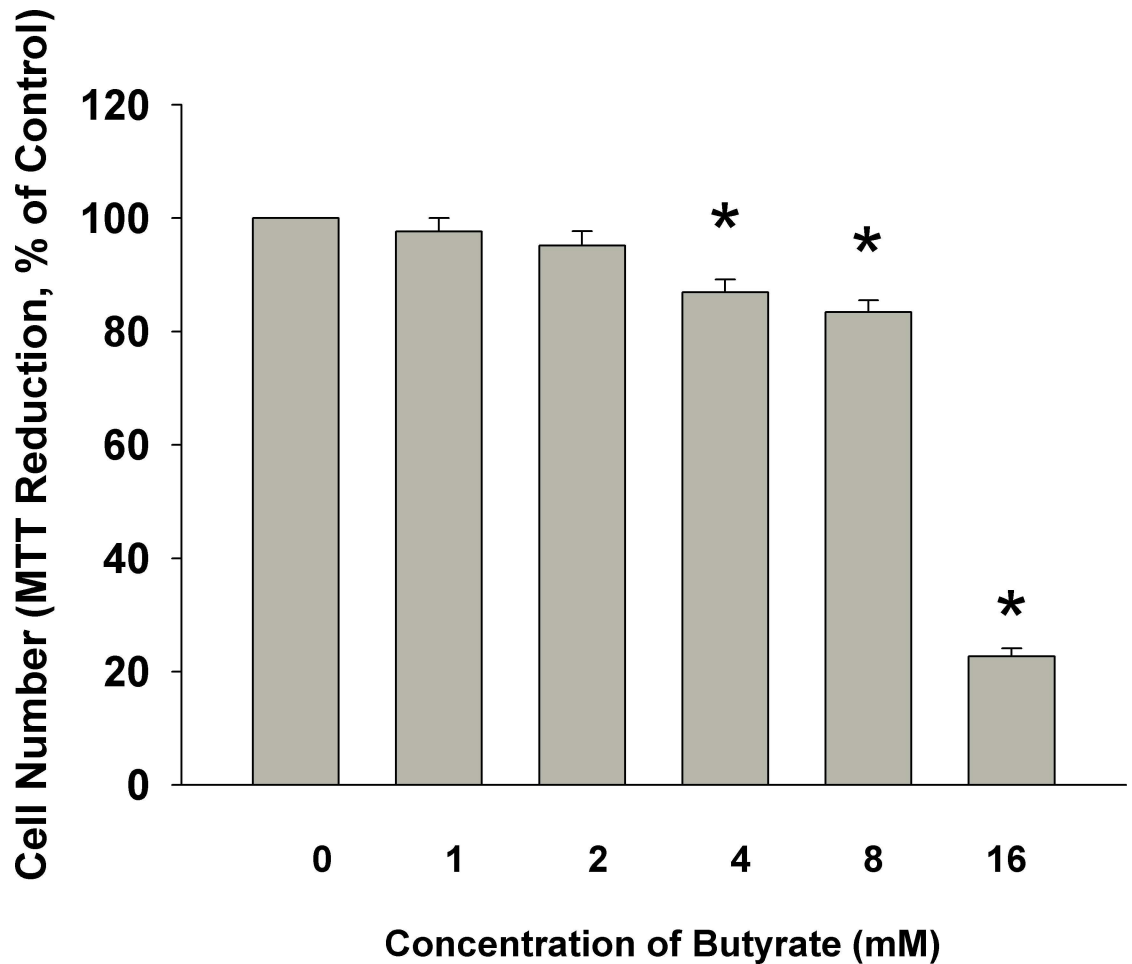

**Fig 1. Effect of butyrate on the cell viability of MG-63 cells.** MG63 cells were exposed to various concentrations of butyrate for 5 days. \*denotes significant difference when compared with control ( $P < 0.05$ ).

doi:10.1371/journal.pone.0165438.g001

protein expression of type I collagen (green fluorescence) after exposure of MG-63 cells to butyrate (Fig 4C).

### Effect of Butyrate on ROS Production of MG-63 cells

A 24-hr exposure of MG-63 cells to butyrate (4–16 mM) markedly elevated the cellular DCF fluorescence by 20–40%. As indicated in the representative histogram, 4–16 mM of butyrate stimulated the ROS levels of MG-63 cells (Fig 5).

### Discussion

Microorganisms are the key etiologic factors of chronic periodontitis and pulpal/periapical diseases. Butyric acid and other SCFA are the metabolic/toxic products generated by numerous pathogenic microorganisms. Their levels in GCF may reach mM concentrations and pose toxic effect on periodontal and periapical tissue cells [3,4,7]. Interestingly, we found that butyrate inhibits the growth of MG-63 osteoblastic cells at concentrations higher than 4 mM, suggesting their roles in bony destruction and impairment of periodontal/periapical bone healing response.

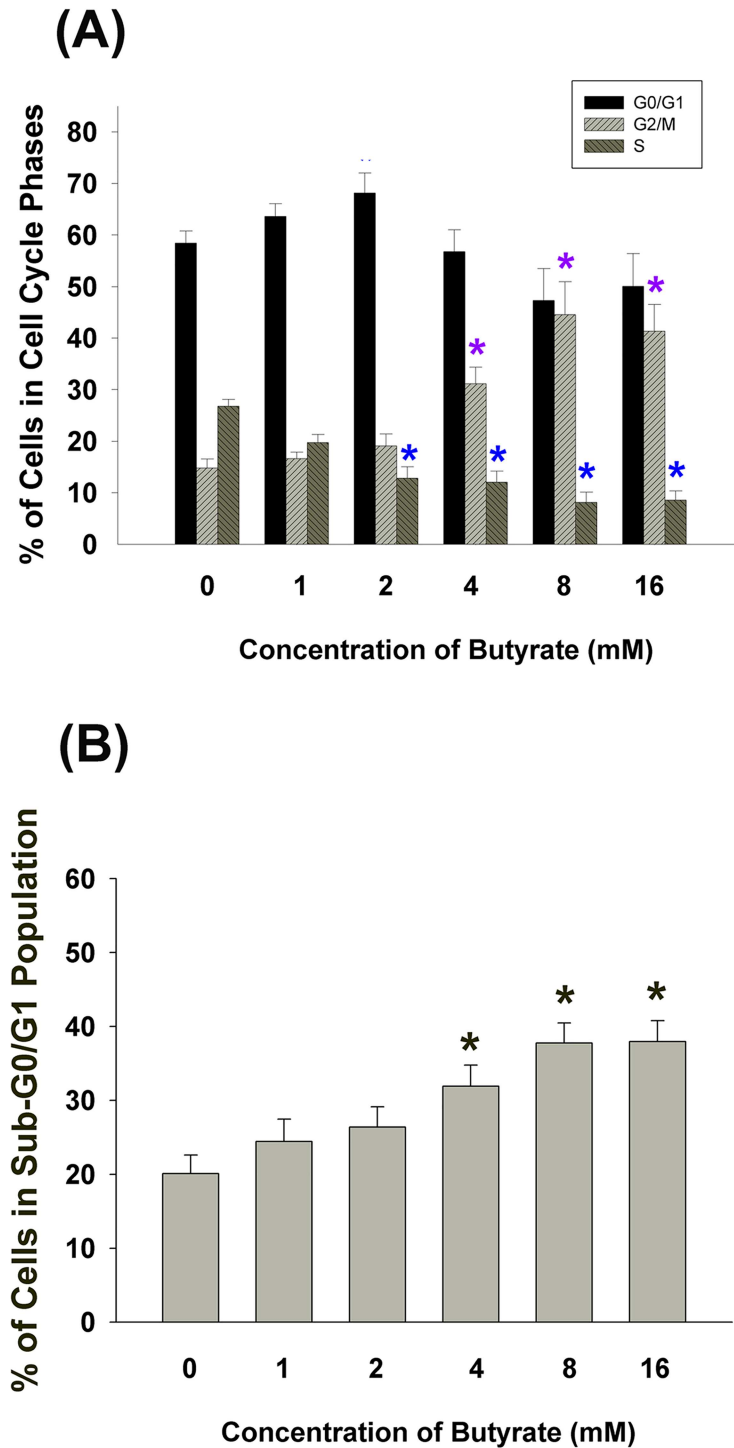

**Fig 2. Effect of butyrate on cell cycle distribution of MG-63 cells.** (A) The effect of different concentration of butyrate (0–16 mM) on G0/G1, G2/M, and S phase of MG-63 cells ( $5 \times 10^5$  cells/well) after 24 hrs exposure time. \*denotes significant difference when compared with control ( $P < 0.05$ ). (B) The effect of different concentration of butyrate (0–16 mM) on sub G0/G1 population of MG-63 cells ( $5 \times 10^5$  cells/well) after 24 hrs. \*denotes significant difference when compared with control ( $P < 0.05$ ).

doi:10.1371/journal.pone.0165438.g002

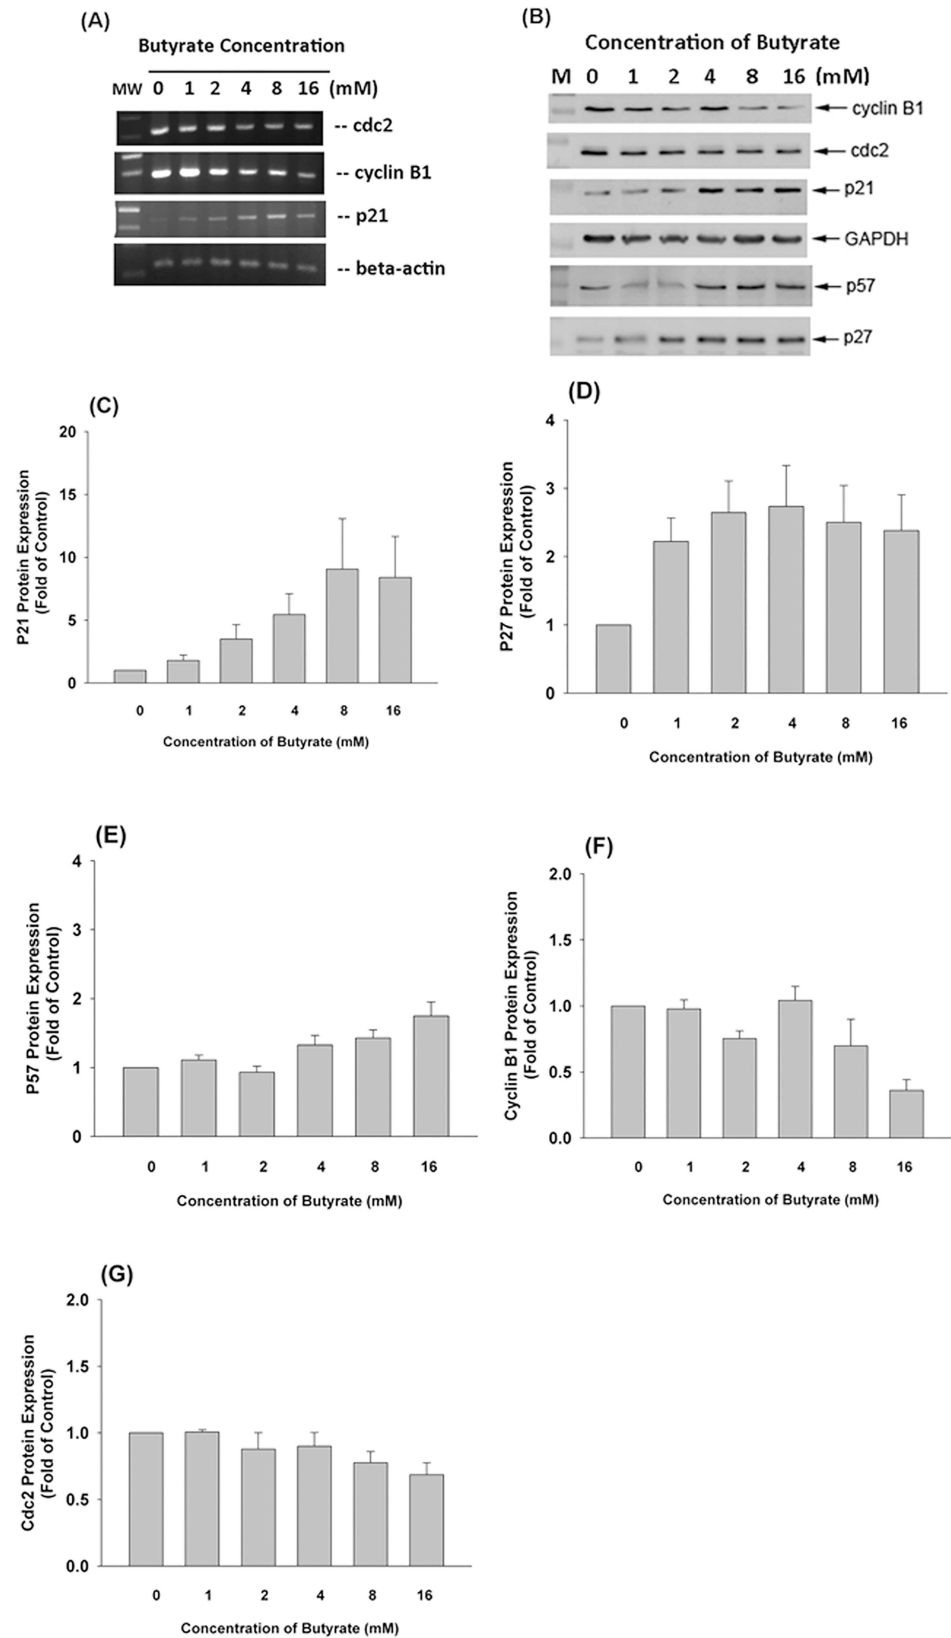



**Fig 3. Effect of butyrate on cell cycle related genes and protein expression of MG-63 cells. (A)** Effect of butyrate on cell cycle related genes (*cdc2*, *cyclinB1*, and *p21*) expression in MG-63 cells. MG-63 cells were exposed to different concentration of butyrate (0–16 mM) for 24 hours. Total RNA was isolated and used for RT-PCR analysis of cellular gene expression. Expression of  $\beta$ -actin was used as control, **(B)** Effect of butyrate on cell cycle related proteins (*cdc2*, *cyclin B1*, *p21*, *p27* and *p57*) expression in MG-63 cells. MG-63 cells were exposed to butyrate (1–16 mM) for 24 hours. Equal amount of proteins from cell lysates were used for western blotting. One representative western blotting picture was shown.

doi:10.1371/journal.pone.0165438.g003

The toxicity of butyric acid is associated with its influence on cell cycle progression. Intriguingly, we discovered that butyrate induced G2/M cell cycle arrest at higher concentration. In addition, butyrate induced apoptosis of MG-63 cells at higher concentrations. This may partly justify the decrease of viable cell number of MG-63 cells after exposure to butyrate. The G0/G1 and G2/M cell cycle progression is tightly controlled by a number of proteins such as *cdc2*, *cyclin B1*, and *p21* [14,23,24]. During cell mitosis, *cyclin B1* may form complex with *cdc2* that can be dephosphorylated at T14 and Y15 by *cdc25C* phosphatase leading to full activation of its *cdc2* Ser/Thr kinase activity and cell cycle progression [25–27]. However, limited information is known regarding the effect of butyrate on cell-cycle related genes of osteoblasts. Interestingly, we found that butyrate down-regulates *cdc2*, and *cyclinB1* gene expression at transcriptional level. Moreover, the protein levels of *cdc2* and *cyclinB1* in MG-63 cells were also suppressed, whereas *p21*, *p27* and *p57* were stimulated after exposure to butyrate. Accordingly, butyrate, as an inhibitor of histone deacetylation, inhibits the growth of liver cancer cells via down-regulation of *cdc2* and *cyclin E* and *cyclin B1* in oral cancer cells [28,29]. In addition, three *cyclin*-dependent kinase inhibitors—*p21*, *p27* and *p57* may affect G0/G1 and G2/M cell cycle progression by inhibition of *cdc2/cyclin B1* and *cyclin D/Cdk4/6*. They also play important roles in cellular apoptosis, senescence, differentiation, cell motility and migration [30,31]. In this study, the induction of *p21*, *p27* and *p57* by butyrate may partially explain its growth inhibitory and apoptotic effects to MG-63 cells. However, butyrate (0.1 mM) has been shown to stimulate osteopontin, bone sialoprotein expression and mineralized nodule formation in healthy human osteoblasts, suggesting a role in bone differentiation [32]. Further studies are necessary to clarify the role of butyrate on differentiation, cell motility and migration of MG-63 osteoblastic cells.

In this study, butyrate also suppresses the type I collagen expression of MG-63 cells. Extracellular matrix proteins such as fibronectin and type I collagen have been shown to activate integrin receptors and down-stream signaling molecules to regulate survival, cell cycle progression, gene expression and matrix mineralization of osteoblasts [33]. The secretion of butyrate from periodontal/periapical microorganisms may thus impair bone repair by inhibition of type I collagen production. However, butyrate is also found to stimulate prostaglandin E<sub>2</sub> (PGE<sub>2</sub>) production, cyclooxygenase (COX) expression, to regulate PGE<sub>2</sub> receptors—EP1 and EP2 receptor, expression and the stimulation of collagen and osteopontin expression in ROS17/2.8 osteoblasts [34]. The precise reasons for this contrast result are not known and await further investigation.

The above toxic effects of butyrate on MG-63 cells may be associated with ROS production. Inducing cytotoxicity, genotoxicity and inflammatory mediators' release by a number of chemicals such as cadmium, areca nut, resin monomers and camphorquinone are associated with cellular ROS production [12,17,20,35]. The sources of ROS can be derived from host cells and microorganisms such as *Porphyromonas gingivalis* and *Enterococci faecalis* [36–38]. Overproduction of ROS may reduce cellular glutathione, damage DNA, proteins and lipids, to activate check-point kinases and control the cell cycle- and apoptosis-related genes [39,40]. Lately redox injectable gel has been effectively used to scavenge ROS and suppresses alveolar bone

(A)

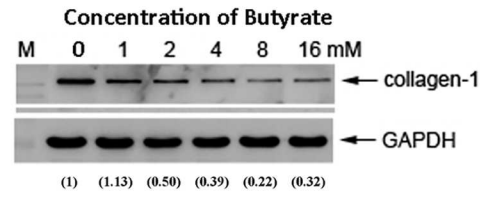

(B)

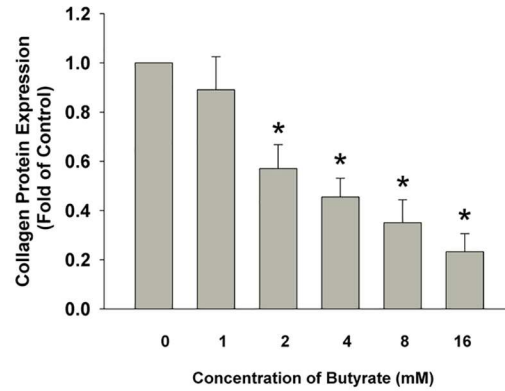

(C)

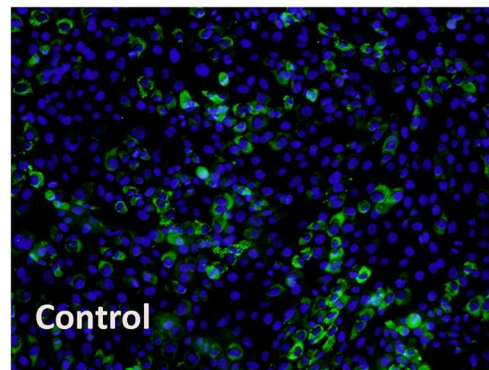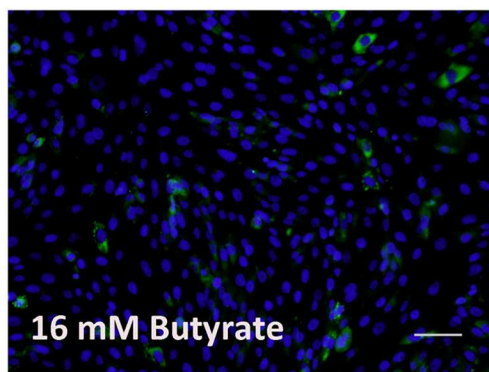

**Fig 4. Effect of butyrate on type I collagen protein expression of MG-63 cells.** (A) MG-63 cells were exposed to butyrate (1–16 mM) for 24 hours. Equal amount of proteins from cell lysates were used for western blotting. One representative western blotting picture was shown. Immunofluorescent analysis of type I collagen protein expression in MG-63 cells after treatment by 16 mM butyrate (control:0 mM), (B) Quantitative analysis for the effect of butyrate on collagen protein expression of MG-63 cells. Results were expressed as fold of control (as 1). \*denotes statistically significant difference when compared with control. (C) Immunofluorescent analysis of type I collagen protein expression in MG-63 cells after treatment by 16 mM butyrate (control:0 mM), scale bar = 200  $\mu$ m.

doi:10.1371/journal.pone.0165438.g004

resorption in rat periodontitis models [41], suggesting the role of ROS in periodontal/periapical bony destruction. Intriguingly, ROS levels in MG-63 cell are elevated after exposure to butyrate in this study. Stimulation of ROS production may be involved in the toxicity of butyrate and the progression of bone destruction. These results indicate that accumulating and generation of butyrate in the periodontal and root canal biofilms may stimulate inflammatory mediators or deregulate host’s defense, contributing to periodontal or periapical bony destruction.

In conclusion, the results of this study indicate that butyrate generated by periapical/periodontal microorganisms exhibits cytostatic effect of osteoblastic cells probably via inhibition

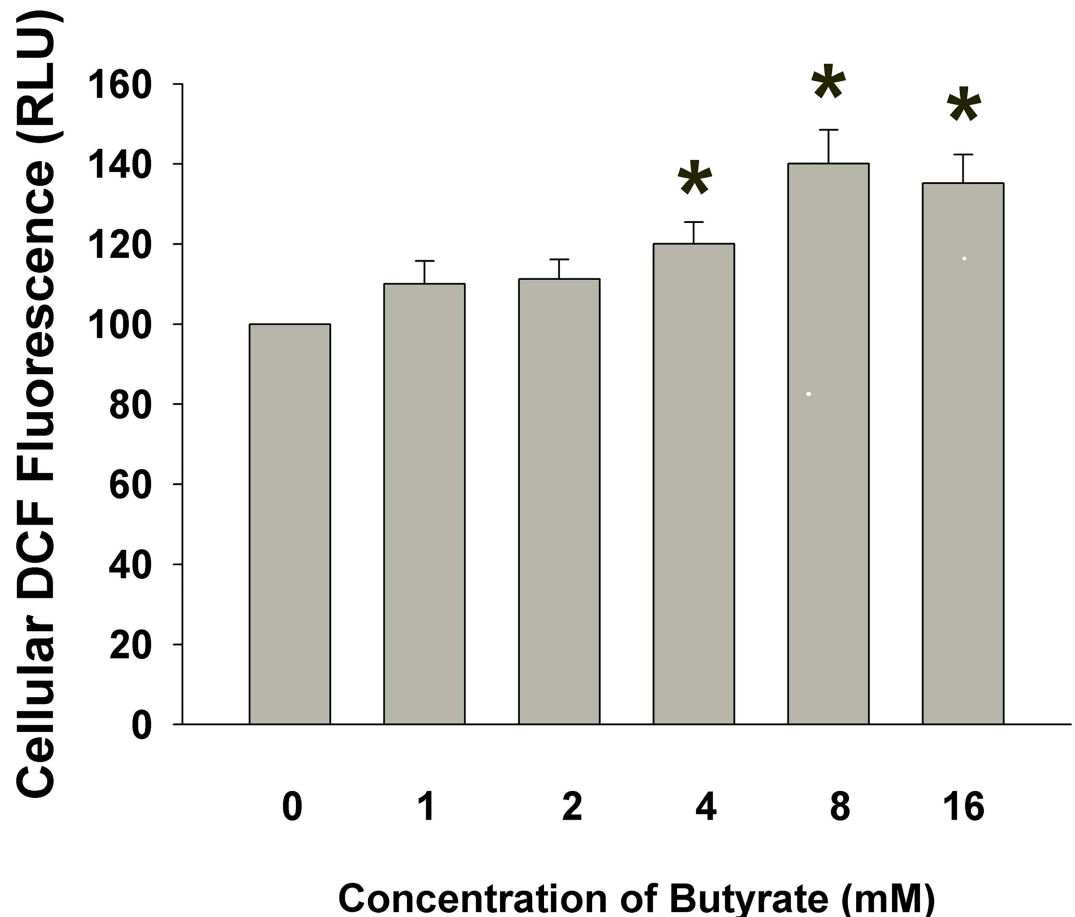

**Fig 5. Effect of butyrate (1–16 mM) on cellular ROS level of MG-63 cells.** One representative histogram of DCF fluorescence in control MG-63 cell and MG-63 cells exposed to 1–16 mM butyrate. An increase in DCF fluorescence was noted, indicating an increase of ROS production. \*denotes statistically significant difference when compared with untreated control (as 100) ( $P < 0.05$ ).

doi:10.1371/journal.pone.0165438.g005

the cell cycle related genes, such as *cdc2*, and *cyclinB1*, as well as the induction of *p21*, *p27* and *p57* leading to cell cycle arrest and apoptosis. Butyrate also suppresses type I collagen expression. These events may impair the bone tissue repair and regeneration. These toxic effects of butyrate may be related to ROS production and contributes to the pathogenesis of periodontal/periapical tissue destruction.

## Supporting Information

**S1 Table. Effect of butyrate on type I collagen expression (fold of control) of MG-63 cells.** The protein expression of western blot results was analyzed by Image J analysis. (DOCX)

## Acknowledgments

This study is supported by grants from Chang Gung Memorial Hospital (CMRPF1F0071, CMRPF3E0021, CMRPF3E0022, CMRPF1F0071, NMRPF3E0041, NMRPF3E0042, NMRPF3C0091, NMRPF3C0092, NMRPF3C0093, NMRPF3C0061, NMRPF3C0062) and Ministry of Science and Technology (MOST104-2314-B-255-010-MY3; NSC102-2628-B-255-001-MY3; NSC102-2314-B-255-003-MY2), Taipei, Taiwan. The authors declare no conflict of interest for this paper.

## Author Contributions

**Conceptualization:** MCC YLT CPC JHJ.

**Data curation:** JHJ CPC.

**Formal analysis:** TMW HCL CMT.

**Funding acquisition:** MCC JHJ CPC YLT EJWL.

**Investigation:** MWL MCC YLT.

**Methodology:** EJWL CMT TMW HCL MWL SYY.

**Project administration:** MCC CPC JHJ.

**Resources:** JHJ CPC.

**Software:** EJWL SYY.

**Supervision:** CPC JHJ.

**Validation:** MCC YLT CPC JHJ.

**Visualization:** SYY CMT.

**Writing – original draft:** MCC YLT CMT.

**Writing – review & editing:** CPC JHJ HCL EJWL.

## References

1. Nishihara T, Koseki T (2004). Microbial etiology of periodontitis. *Periodontol* 2000 36: 14–26.
2. Uematsu H, Sato N, Hossain MZ, Ikeda T, Hoshino E (2003) Degradation of arginine and other amino acids by butyrate-producing asaccharolytic anaerobic Gram-positive rods in periodontal pockets. *Arch Oral Biol* 48: 423–429. PMID: [12749914](#)

3. Niederman R, Zhang J, Kashket S (1997). Short-chain carboxylic-acid- stimulated, PMN-mediated gingival inflammation. *Crit Rev Oral Biol Med* 8: 269–290. PMID: [9260044](#)
4. Niederman R, Buyle-Bodin Y, Lu BY, Robinson P, Naleway C (1997) Short-chain carboxylic acid concentration in human gingival crevicular fluid. *J Dent Res* 76: 575–579. PMID: [9042080](#)
5. Thomas LV, Suzuki K, Zhao J (2007). Bacterial pathogenesis and mediators in apical periodontitis. *Braz Dent J* 18: 267–280 PMID: [18278296](#)
6. Niederman R, Buyle-Bodin Y, Lu BY, Naleway C, Robinson P, Kent R (1996) The relationship of gingival crevicular fluid short chain carboxylic acid concentration to gingival inflammation. *J Clin Periodontol* 23: 743–749 PMID: [8877660](#)
7. Pollanen MT, Overman DO, Salonen JI (1997). Bacterial metabolites sodium butyrate inhibits epithelial cell growth in vitro. *J Periodont Res* 32: 326–334. PMID: [9138199](#)
8. Jeng JH, Chan CP, Ho YS, Lan WH, Hsieh CC, Chang MC (1999). Effects of butyrate and propionate on the adhesion, growth, cell cycle kinetics and protein synthesis of cultured human gingival fibroblasts. *J Periodontol* 70: 1435–1442. doi: [10.1902/jop.1999.70.12.1435](#) PMID: [10632518](#)
9. Chang MC, Tsai YL, Chen YW, Chan CP, Huang CF, Lan WC, et al. (2013) Butyrate induces reactive oxygen species production and affects cell cycle progression in human gingival fibroblasts. *J Periodontal Res* 48: 66–73. doi: [10.1111/j.1600-0765.2012.01504.x](#) PMID: [22834967](#)
10. Morozumi A (2011). High concentration of sodium butyrate suppresses osteoblastic differentiation and mineralized nodule formation in ROS17/2.8 cells. *J Oral Sci* 53: 509–516. PMID: [22167038](#)
11. Kurita-Ochiai T, Fukushima K, Ochiai K (1995). Volatile fatty acids, metabolic by-products of periodontopathic bacteria, inhibit lymphocyte proliferation and cytokine production. *J Dent Res* 74: 1367–1373. PMID: [7560387](#)
12. Ziech D, Franco R, Pappa A, Panayiotidis MI (2011) Reactive oxygen species (ROS)–induced genetic and epigenetic alterations in human carcinogenesis. *Mutat Res, Fundamental & Molecular Mechanism Mutagenesis* 711: 167–173.
13. Bertin G, Averbeck D (2006). Cadmium: cellular effects, modifications of biomolecules, modulation of DNA repair and genotoxic consequences. *Biochimie* 88: 1549–1559 doi: [10.1016/j.biochi.2006.10.001](#) PMID: [17070979](#)
14. Galli C, Passeri G, Macaluso GM (2011). FoxOs, Wnts and oxidative stress-induced bone loss: new players in the periodontitis arena? *J Periodont Res* 46: 397–406. doi: [10.1111/j.1600-0765.2011.01354.x](#) PMID: [21332475](#)
15. Bartek J, Lukas J (2001). Pathways governing G1/S transition and their response to DNA damage. *FEBS Lett* 490: 117–22. PMID: [11223026](#)
16. O'Connor PM (1997). Mammalian G1 and G2 phase checkpoints. *Cancer Surv* 29: 151–182. PMID: [9338101](#)
17. Chang MC, Lin LD, Wu MT, Chan CP, Chang HH, Lee MS, et al. (2015) Effects of camphorquinone on cytotoxicity, cell cycle regulation and prostaglandin E2 production of dental pulp cells: Role of ROS, ATM/Chk2, MEK/ERK and hemoxygenase-1. *PLoS ONE* 10: e0143663. doi: [10.1371/journal.pone.0143663](#) PMID: [26658076](#)
18. Chang MC, Wu HL, Lee JJ, Lee PH, Chang HH, Hahn LJ, et al. (2004) The induction of prostaglandin E2 production, IL-6 production, cell cycle arrest and cytotoxicity in primary oral keratinocytes and KB cancer cells by areca nut ingredients is differentially regulated by MEK/ERK activation. *J Biol Chem* 279: 50676–50683. doi: [10.1074/jbc.M404465200](#) PMID: [15375172](#)
19. Chang HH, Guo MK, Kastan FH, Chang MC, Huang GF, Wang YL, et al. (2005) Stimulation of glutathione depletion, ROS production and cell cycle arrest of dental pulp cells and gingival epithelial cells by HEMA. *Biomaterials* 26: 745–753. doi: [10.1016/j.biomaterials.2004.03.021](#) PMID: [15350779](#)
20. Jeng JH, Ho YS, Chan CP, Wang YJ, Hahn LJ, Lei D, et al. (2000) Areca nut extract up-regulates prostaglandin production, cyclooxygenase-2 mRNA and protein expression of human oral keratinocytes. *Carcinogenesis* 21: 1365–1370. PMID: [10874015](#)
21. Lee PH, Chang MC, Chang WH, Wang TM, Wang YJ, Hahn LJ, et al. (2006) Prolonged exposure to arecoline arrested human KB epithelial cells growth, regulatory mechanisms of cell cycle and apoptosis. *Toxicology* 220: 81–90. doi: [10.1016/j.tox.2005.07.026](#) PMID: [16413651](#)
22. Chang MC, Chen LI, Chan CP, Lee JJ, Wang TM, Yang TT, et al. (2010) The role of reactive oxygen species and hemoxygenase-1 expression in the cytotoxicity, cell cycle alteration and apoptosis of dental pulp cells induced by BisGMA. *Biomaterials* 31: 8164–8171 doi: [10.1016/j.biomaterials.2010.07.049](#) PMID: [20673999](#)
23. Kurita-Ochiai T, Seto S, Suzuki N, Yamamoto M, Otsuka K, Abe K, et al. (2008) Butyric acid induces apoptosis in inflamed fibroblasts. *J Dent Res* 87: 51–55. PMID: [18096893](#)

24. Taylor WR, Stark GR (2001). Regulation of the G2/M transition by p53. *Oncogene* 20: 1803–1815. doi: [10.1038/sj.onc.1204252](https://doi.org/10.1038/sj.onc.1204252) PMID: [11313928](https://pubmed.ncbi.nlm.nih.gov/11313928/)
25. Muller GA, Engeland K (2010). The central role of CDE/CHR promoter elements in the regulation of cell cycle-dependent gene transcription. *FEBS J* 277: 877–893. doi: [10.1111/j.1742-4658.2009.07508.x](https://doi.org/10.1111/j.1742-4658.2009.07508.x) PMID: [20015071](https://pubmed.ncbi.nlm.nih.gov/20015071/)
26. Le Breton M, Cormier P, Belle R, Mulner-Lorillon O, Morales J (2005) Translational control during mitosis. *Biochimie* 87: 805–811. doi: [10.1016/j.biochi.2005.04.014](https://doi.org/10.1016/j.biochi.2005.04.014) PMID: [15951098](https://pubmed.ncbi.nlm.nih.gov/15951098/)
27. Aressy B, Ducommun B (2008). Cell cycle control by the CDC25 phosphatases. *Anticancer Agents Med Chem* 8: 818–824. PMID: [19075563](https://pubmed.ncbi.nlm.nih.gov/19075563/)
28. Wakabayashi K, Saito H, Kaneko F, Nakamoto N, Tada S, Hibi T (2005) Gene expression associated with the decrease in malignant phenotype of human liver cancer cells following stimulation with a histone deacetylase inhibitor. *Int J Oncol* 26: 233–239. PMID: [15586245](https://pubmed.ncbi.nlm.nih.gov/15586245/)
29. Jeng JH, Kuo MY, Lee PH, Wang YJ, Lee MY, Lee JJ, et al. (2006) Toxic and metabolic effect of sodium butyrate on SAS tongue cancer cells: role of cell cycle deregulation and redox changes. *Toxicology* 223: 235–247. doi: [10.1016/j.tox.2006.04.033](https://doi.org/10.1016/j.tox.2006.04.033) PMID: [16737765](https://pubmed.ncbi.nlm.nih.gov/16737765/)
30. Tury A, Mairet-Coello G, DiCicco-Bloom E (2012). The multiple roles of the cyclin-dependent kinase inhibitory protein p57(KIP2) in cerebral cortical neurogenesis. *Dev Neurobiol* 72: 821–842.
31. Rossi MN, Antonangeli F (2015). Cellular response upon stress: p57 contribution to the final outcome. *Mediators Inflamm* 2015:259325.
32. Katono T, Kawato T, Tanabe N, Suzuki N, Iida T, Morozumi A, et al. (2008) Sodium butyrate stimulates mineralized nodule formation and osteoprotegerin expression by human osteoblasts. *Arch Oral Biol* 53: 903–909. doi: [10.1016/j.archoralbio.2008.02.016](https://doi.org/10.1016/j.archoralbio.2008.02.016) PMID: [18406397](https://pubmed.ncbi.nlm.nih.gov/18406397/)
33. Garcia AJ, Reyes CD (2005). Bio-adhesive surfaces to promote osteoblast differentiation. *J Dent Res* 84: 407–413. PMID: [15840774](https://pubmed.ncbi.nlm.nih.gov/15840774/)
34. Iida T, Kawato T, Tanaka H, Tanabe N, Nakai K, Zhao N et al. (2011) Sodium butyrate induces the production of cyclooxygenases and prostaglandin E2 in ROS 17/2.8 osteoblastic cells. *Arch Oral Biol* 56: 678–686. doi: [10.1016/j.archoralbio.2010.12.013](https://doi.org/10.1016/j.archoralbio.2010.12.013) PMID: [21281931](https://pubmed.ncbi.nlm.nih.gov/21281931/)
35. Chang MC, Chan CP, Chen YJ, Hsien HC, Chang YC, Yeung SY, et al. (2016) Areca nut components affect COX-2, cdc2, and keratin expression as well as ADAM17, IL-1, PGE2 and 8-isoprostane production in oral keratinocytes: Role of reactive oxygen species, EGF and JAK signaling. *Oncotargets* 7: 16879–16894.
36. Battino M, Bullon P, Wilson M, Newman H (1999) Oxidative injury and inflammatory periodontal diseases: the challenge of anti-oxidants to free radicals and reactive oxygen species. *Crit Rev Oral Biol Med* 10: 458–476. PMID: [10634583](https://pubmed.ncbi.nlm.nih.gov/10634583/)
37. Waddington RJ, Moseley R, Embery G (2000). Reactive oxygen species: a potential role in the pathogenesis of periodontal diseases. *Oral Dis* 6: 138–151. PMID: [10822357](https://pubmed.ncbi.nlm.nih.gov/10822357/)
38. Szemes T, Vlkova B, Minarik G, Tothova L, Drahovska H, Turna J, et al. (2010) On the origin of reactive oxygen species and antioxidative mechanisms in *Enterococcus faecalis*. *Redox Rep* 15: 202–206. doi: [10.1179/135100010X12826446921581](https://doi.org/10.1179/135100010X12826446921581) PMID: [21062535](https://pubmed.ncbi.nlm.nih.gov/21062535/)
39. Sarsour EH, Kumar MG, Chaudhuri L, Kalen AL, Goswami PC (2009) Redox control of the cell cycle in health and disease. *Antioxid Redox Signal* 11: 2985–3011. doi: [10.1089/ARS.2009.2513](https://doi.org/10.1089/ARS.2009.2513) PMID: [19505186](https://pubmed.ncbi.nlm.nih.gov/19505186/)
40. Ansteinson V, Solhaug A, Samuelsen JT, Kalen AL, Goswami PC (2011) DNA-damage, cell cycle arrest and apoptosis induced in BEAS-2B cells by 2-hydroxyethyl methacrylate (HEMA). *Mutat Res* 723: 158–164. doi: [10.1016/j.mrgentox.2011.04.011](https://doi.org/10.1016/j.mrgentox.2011.04.011) PMID: [21640196](https://pubmed.ncbi.nlm.nih.gov/21640196/)
41. Saita M, Kaneko J, Sato T, Takahashi SS, Wada-Takahashi S, Kawamata R, et al. (2016) Novel antioxidative nanotherapeutics in a rat periodontitis model: Reactive oxygen species scavenging by redox injectable gel suppresses alveolar bone resorption. *Biomaterials* 76: 292–301. doi: [10.1016/j.biomaterials.2015.10.077](https://doi.org/10.1016/j.biomaterials.2015.10.077) PMID: [26559357](https://pubmed.ncbi.nlm.nih.gov/26559357/)
